# Supplementary material
Source: HighWire-hosted journal article supplement (https://bmjopen.bmj.com/content/12/4/e059833)
Supplement: inline-supplementary-material-1 [file inline-supplementary-material-1.pdf]

## The use of infrared thermography in medical diagnostics: a scoping review protocol

Searchstrategy PubMed 29 Nov 2021

1. thermography[MeSH Terms] 7,912
2. spectrophotometry, infrared[MeSH Terms] 72,435
3. "infrared" [Text Word] AND "temperature" [Text Word] 35,509
4. "thermology"[Text Word] 21
5. "infrared camera"[Text Word] 979
6. ("contact"[Text Word] OR "infrared"[Text Word]) AND thermography[Text Word] 3,630
7. ("therm\*" [Text Word] OR "infrared"[Text Word]) AND "imag\*" [Text Word] 56,950
8. diagnosis/prevention and control[MeSH Terms] 26,242
9. diagnostic techniques and procedures[MeSH Terms:noexp] 3,570
10. disease progression[MeSH Terms] OR monitoring/physiologic[MeSH Terms] 382,038
11. mass screening[MeSH Terms:noexp] OR early diagnosis[MeSH Terms] 161,379
12. reference value[MeSH Terms] OR normal value\*[Text Word] 148,250
13. #1 OR #2 OR #3 OR #4 OR #5 OR #6 OR #7 148,250
14. #8 OR #9 OR #10 OR #11 OR #12 744,161
15. #13 AND #14 2,815
16. #15 AND (humans[Filter]) 2,253
17. #15 AND (humans[Filter]) AND (2000/1/1:2021/11/11[pdat]) 1,624
18. #15 AND (humans[Filter]) AND (2000/1/1:2021/11/11[pdat]) AND (Clinical Study[Filter] OR Comparative Study[Filter] OR Controlled Clinical Trial[Filter] OR Evaluation Study[Filter] OR Journal Article[Filter] OR Pragmatic Clinical Trial[Filter] OR Review[Filter] OR Systematic Review[Filter] OR Technical Report[Filter]) **1,592**
