# Supplementary material
Source: HighWire-hosted journal article supplement (https://bmjopen.bmj.com/content/12/4/e059833)
Supplement: inline-supplementary-material-2 [file inline-supplementary-material-2.pdf]

Data Extraction Table with Examples

## Review Matrix on the Use of Infrared Thermographic Imaging in Medical Diagnostics: a Scoping Review

| Reference & Purpose                  |                           |                                                                                                                                                                     |                                                 |                                                              |                                                                                                                                               | Study Design & Participants                                          |                                                                                                                                                                   |                                                                                                                                                                                                          |                              | Content & Results |                                                                                                                                                                                                                        |                                                    |                                                                               |                                                                                  |                                                                                                                                                                                        | Conclusion & Comment                                                                       |                                                                                                                            |                                                                                                                                                                                                     |
|--------------------------------------|---------------------------|---------------------------------------------------------------------------------------------------------------------------------------------------------------------|-------------------------------------------------|--------------------------------------------------------------|-----------------------------------------------------------------------------------------------------------------------------------------------|----------------------------------------------------------------------|-------------------------------------------------------------------------------------------------------------------------------------------------------------------|----------------------------------------------------------------------------------------------------------------------------------------------------------------------------------------------------------|------------------------------|-------------------|------------------------------------------------------------------------------------------------------------------------------------------------------------------------------------------------------------------------|----------------------------------------------------|-------------------------------------------------------------------------------|----------------------------------------------------------------------------------|----------------------------------------------------------------------------------------------------------------------------------------------------------------------------------------|--------------------------------------------------------------------------------------------|----------------------------------------------------------------------------------------------------------------------------|-----------------------------------------------------------------------------------------------------------------------------------------------------------------------------------------------------|
| RefID<br>only for<br>internal<br>use | Source<br>Database<br>DOI | Author(s)<br>Title                                                                                                                                                  | Publication:<br>Type<br>Year<br>Journal         | Origin:<br>Research<br>&<br>Sample                           | Aims / Purpose                                                                                                                                | #                                                                    | Characteristics                                                                                                                                                   | Study and Sample<br>Design, Setting                                                                                                                                                                      | Health<br>Condition          | Year<br>Collected | Methodology<br>(technical and<br>environmental) &<br>Device                                                                                                                                                            | (Diagnostic)<br>Purpose<br>e.g. Screening          | Examination /<br>Application                                                  | Comparator                                                                       | Outcome(s)                                                                                                                                                                             | Key<br>Findings<br>related to<br>review<br>objectives                                      | Author's<br>Conclusion                                                                                                     | Reviewer's<br>Comments                                                                                                                                                                              |
|                                      |                           | Aggarwal N, Garg M, Dwarakanathan V et al.<br>Diagnostic accuracy of non-contact infrared thermometers and thermal scanners: a systematic review and meta-analysis. | Journal Article<br>2008<br><i>J Travel Med</i>  | Research: India, USA<br>Sample: International (15 countries) | Investigate diagnostic accuracy of non-contact infrared thermometers and thermal scanners for the detection of fever                          | 19<br>Studies in meta-analysis, 12,759 patients with 13,874 readings | Neonates, children, adults                                                                                                                                        | Systematic review and Meta-analysis<br>Studies on assessment of diagnostic accuracy of non-contact infrared thermometers and thermal scanners.<br>Setting: inpatient, outpatient / airport, unclassified | Unclear, possible fever      | 2004 - 2020       | Contactless infrared thermal imaging systems for temperature measurements.<br>Handheld non-contact infrared thermometers (NCITs) and thermal scanners                                                                  | Thermal screening during a pandemic                | Fever measured by non-contact infrared devices                                | Fever measured by conventional thermometer (tympanic, axillary, rectal, oral)    | NCITs sensitivity 0.781 (95%CI 0.628–0.882) and specificity 0.926 (95%CI 0.795–0.975) Thermal scanners sensitivity 0.818 (95%CI 0.758–0.866) and specificity 0.923 (95%CI 0.823–0.969) | NCITs and thermal scanners are validated instruments for mass screening of fever           | Handheld NCITs and thermal scanners have a reasonable sensitivity and specificity in detecting fever.<br>However,          |                                                                                                                                                                                                     |
|                                      |                           | Jesenšek Papež B, Palfy M, Turk, Z.<br>Infrared Thermography Based on Artificial Intelligence for Carpal Tunnel Syndrome Diagnosis.                                 | Journal Article<br>2008<br><i>J Int Med Res</i> | Slovenia                                                     | Improve the diagnosis of CTS with thermography using a computer-based system employing artificial neural networks (ANN) to analyse the images | 30<br>pathological, 26 healthy, 112 images                           | Adult (26-71 years, 15 females, 8 males) patients with confirmed CTS without previous surgery, volunteers (28-66 years, 8 females, 5 males) confirmed with no CTS | Observational Study<br>Patients referred by general practitioners and specialists to the Department of Physical Medicine and Rehabilitation, Medical Centre Maribor,                                     | Carpal tunnel syndrome (CTS) | n.a.              | Neo Thermo TVS-700 camera (NEC Avio Infrared Technologies, Tokyo, Japan) resolution 320 × 240 pixels, standard distance 80 cm, ambient temperature 23±1 °C; relative humidity 56±8%. Software application based on ANN | Computer aided diagnosis of carpal tunnel syndrome | Dorsal and palmar thermographic imaging of CTS confirmed by electro-myography | Dorsal and palmar thermographic imaging of no CTS confirmed by electro-myography | The classification success rate for the dorsal side of the hand was in mean 80.6%. Palmar segments had no beneficial influence on the outcome                                          | CTS with computer aided thermographic diagnostic is a promising field for further research | Relatively high success rates give rise to optimism, especially when there is still plenty of scope for method improvement | Temperature of each individual segment normalized according to the mean temperature of the whole hand facilitates inter-individual comparisons. Computer aided diagnosis can be resource efficient. |
